# Supplementary material for: Negative feedback regulation of ABA biosynthesis in peanut (Arachis hypogaea): a transcription factor complex inhibits AhNCED1 expression during water stress
Source: PubMed Central journal article supplement (PMC5124963; doi:10.1038/srep37943), 2016-11-28
Supplement: srep37943-s1.pdf [file srep37943-s1.pdf]

# Negative feedback regulation of ABA biosynthesis in peanut (*Arachis hypogaea*): a transcription factor complex inhibits *AhNCED1* expression during water stress

Shuai Liu<sup>1</sup>, Meijuan Li<sup>1</sup>, Liangchen Su<sup>1</sup>, Kui Ge<sup>1</sup>, Limei Li<sup>1</sup>, Xiaoyun Li<sup>1</sup>, Xu Liu<sup>2</sup>, Ling Li<sup>1,\*</sup>

<sup>1</sup> Guangdong Provincial Key Laboratory of Biotechnology for Plant Development, School of Life Sciences, South China Normal University, Guangzhou, China.

<sup>2</sup> Molecular Analysis and Genetic Improvement Center, South China Botanical Garden, Chinese Academy of Science, Guangzhou 510650, China. Correspondence and requests for materials should be addressed to L. L. (email: liling502@126.com)

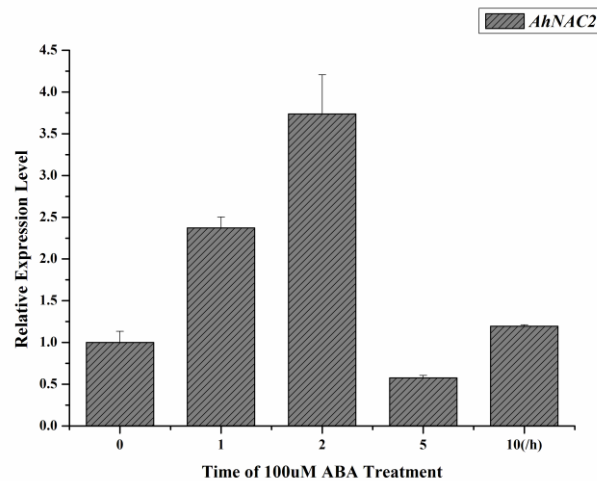

Supplementary Figure S1 Expression of *AhNAC2* in response to ABA.

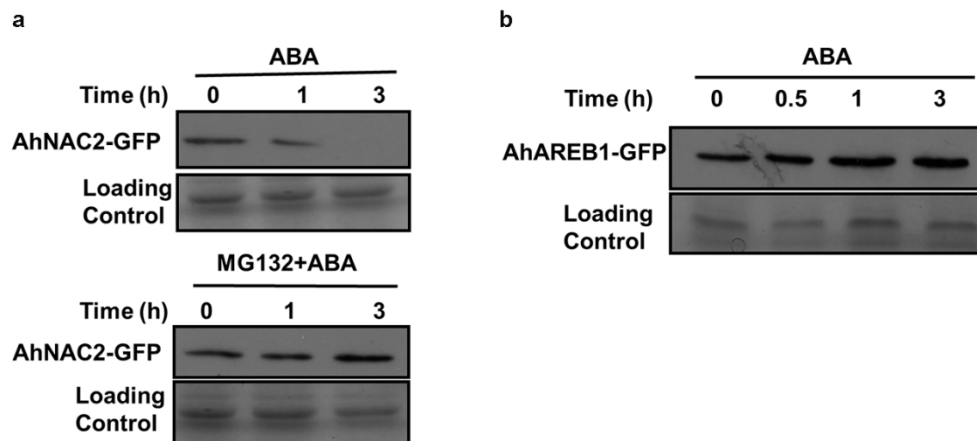

**Supplementary Figure S2** AhNAC2 or AhAREB1 protein accumulation is affected by ABA treatment in corresponding over-AhNAC2-GFP or over-AhAREB1-GFP transgenic *A. thaliana* lines. (a) The effect of ABA on AhNAC2-GFP protein levels with or without MG132 pretreatment in a *p35S::AhNAC2-GFP* *A. thaliana* line. (b) The effect of ABA on AhNAC2-GFP protein levels in a *p35S::AhAREB1-GFP* *A. thaliana* line.

TTCAAAAGGATGACATTATTTGACTTGAAATGGAGTTTAAGAAAAAGAAAAAGATTTTTAATTTATAATTCTAAATTAAGTTGTG  
TCAAATATACCAAATGCGCTTTAATTTATGATCTTAAATATGT CACGTGGCAAGTTAAAGTTAAATGTTACAAAAAATAAATGAATA  
ATTCTTTTGAACAGACTTAAAAGGAAACATGGTCATCTTTTTTAAATGGAAGGAATATTTAAATTTCTAAATTAACAAACATCCATCT  
ACGATTAATGTAATTGTAATAAAATAAAATGTTTCTACAATTTTTTAAAGAAAGAATTATGTATAATTTCTTTCTTAATTTATGTAATC  
TTTTATTGAAAATTTTCAAAGGATAACATTTTTAAATTTAGTATAAATTATAATTTAACCTTTTTTTTAAAAATATATGTAAGTAATTT  
ATGACATAAATTGAAATTAGAGGAGTAGATTATTTACGCCCTCAACATGAGCG CGTGAGGAAGTAGGCAAAGAAACACTTTTATAGTTG  
CTGCACATTTTATGAAACAATAAAAAAGTGCATCAATAGTACTGCTCACTCTGACTACTGCTTTGGCGAGTTGTTAACATGTTTTTT  
TTATTAGGATGGTGCACCATAAAATTTATTTTTTTCATATTAAGATTTGAATTATGATTTTTCAGTATTCAAATTTAAACTTTTAGTTAA  
AG CACGAGTGGAAATCAATTTACCTTTTAGTTATATGTTAAACATTTAATTAATTGTATAATTTATTTGTTTTTATATAAGAAGCTAGC  
AAATAACAATAGATAAATTTAAAAATATTATACCTAAAAATTTGATTTATTTCTTATTCAATTCGTCCTATATACATTTTCTCAGTTCAA  
TAGAATCGTCCACAAGAACCTTCGATTTCTTTAAACACATATAATCTTTAAATTTGCTCTTATTTTTTATTTTTCATAATCTATCTTAGTCTT  
GTTTCATTTTGATCCTCATGCTCTTTTTTCAAATAAAGCTAAGGGGTTAAATGAAATAAGACTAAGCTAGAGTGTCAATATGAAAAACG  
AGGGCATGTTAACATGACTATCTATGTATTTGGTCTCTCTTTTATTTTATTTATCTAATTTAACTTGACATGCAAAATAACACTAATAAAAT  
AAATTTAGTGAATTTTAAAAATTTAAATTTGAAAAGGATAAAATATATCCGATGTTATCACTATATCTCCTAGGTAGATATAGATTGTTTT  
AAAAAATTATCAATCCAAATAAATTAATGCAGTGATAAAAAAATATTACGAATAATAGCAAAGTAGTGATAGCATATATGCAAGAGAT  
CATATACTTGGAATATCAAACACTACATATATAAAATGAGATGAAGGGAGTATCAACTTTTTTTTGATTTATTTAAAAGAAATGATTGAGA  
ACACTCCTAAACTACGCATGAATTATTAGTTTCATTTCTGAATTATTGACAGAATAAGACACTTATTAGTTGACTAACTAGACTAAAAT  
ACACCATAATTTGTAATATGAGCGAAACACCTCAAATTTCTCATTAAATTTAGGAATACTTCAATACTTTTCTCATTTTATTAATAAT  
CTCATTCTCTACAAAAGTTTACGCTCATTGTTATGT CGTGTTGCATATCAATACTTGTCGTTGGTTTATTTAATTGAATTTTCGATTTATG  
AGTTTGACATTAATACCCTACCATTATGTTGCTCCCAAGTGACCTTCTCACAAATACCAC CACGTGCTCTTCTTAGATGTCTAAGGT  
GGACCTCGTCCCTCTTCCACATACACTCCCTTTTTTCTCAAACATCTTCTCTATTTAAACCCTCTTCTTCCCTCTCTCTCTAC  
TCAACCCCAACAATTCTCTTTTCTCCCTTTTTTTTTCTCTCTTCAAAGAAGGAAAAAAAAT

**Supplementary Figure S3** The bioinformatics analysis of the 2000-bp upstream region of NCED1 in tomato. The

yellow highlights indicates ABRE *cis*-acting elements and green indicates *cis*-acting core NACRE elements.

**Supplemental Table 1** Primers used in the paper

| Name       | Sequence                   |
|------------|----------------------------|
| Actin QF   | GATTGGAATGGAAGCTGCTG       |
| Actin QR   | CGGTCAGCAATACCAGGGAA       |
| adh3F QR   | GACGCTTGGCGAGATCAACA       |
| adh3F QR   | AACCGGACAACCACCACATG       |
| pN1-F      | GCAAGCGTGTGGGGTAGTAA       |
| pN1-R      | GAGTGAGAGTTGAGAGTGTC       |
| pN2-F      | CAACAAACAAACCAAAATGC       |
| pN2-R      | TAGGAGGGGTGTGAAGAAGA       |
| pN3-F      | TAATAAAGCAAAGAACTCAATTTA   |
| pN3-R      | TGAGAAAGTTGAGGGATGAGGGGAG  |
| pN4-F      | CCTTCCTTCTCTTGTATTCCA      |
| pN4-R      | TGATACACTGCCACGAACACTCTAC  |
| pN5-F      | TCTTGATCACTTATTGGCAATCCAAC |
| pN5-R      | TTGATTGAAGAATAGTAATGGGTGGT |
| pN6-F      | ACTCACAACCACCTCTC          |
| pN6-R      | GCAAGTAAGTAGCAGGGG         |
| AhNCED1 QF | TTACCTGTGGGATTGTTTGC       |
| AhNCED1 QR | ACATGAGCCTCTACTTCTGC       |

## Full-length gels and blots

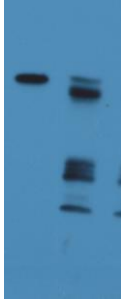

Figure 2b Anti-GST

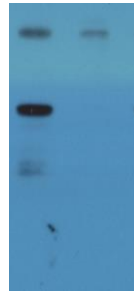

Figure 2b Anti-AhNAC2

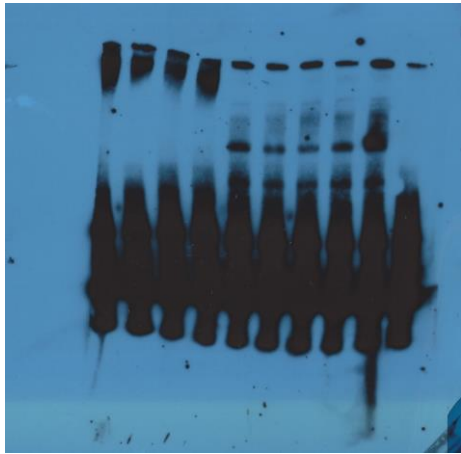

Figure 4b

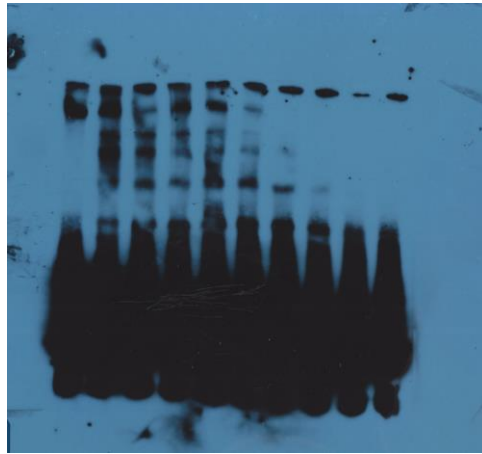

Figure 4c

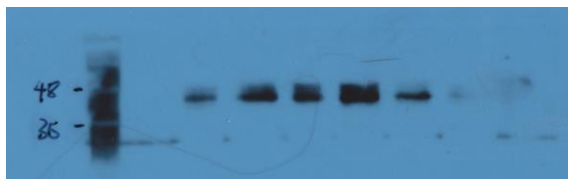

Figure 5b AhAREB1

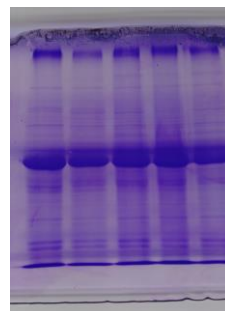

Figure 5b AhAREB1 loading Control

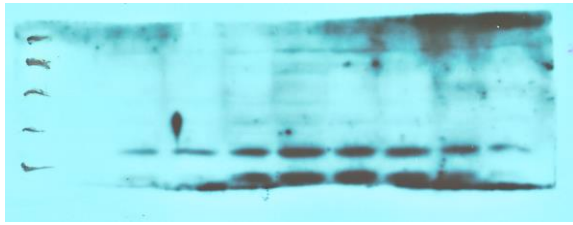

Figure 5b AhNAC2

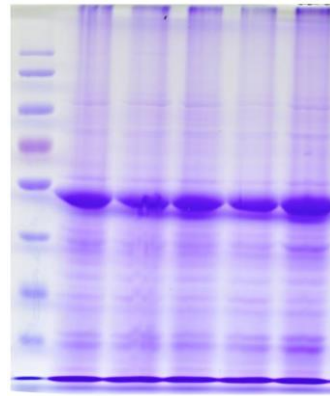

Figure 5b AhNAC2 loading Control

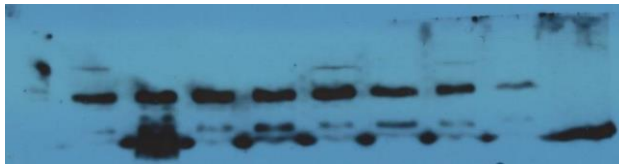

Figure 6a AhNAC2

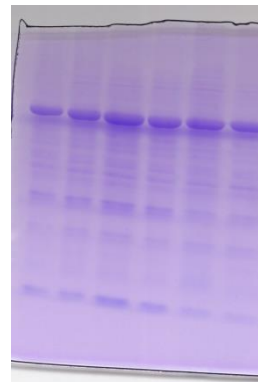

Figure 6a AhNAC2 loading Control

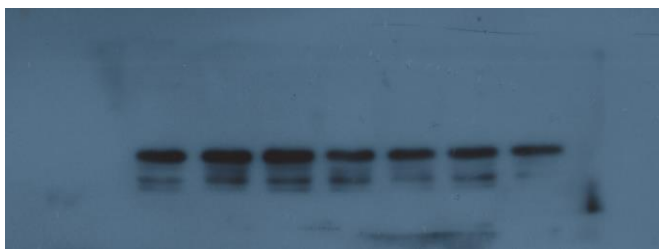

Figure 6b AhNAC2

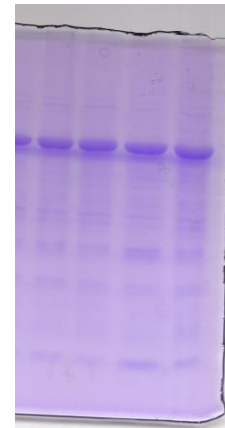

Figure 6b AhNAC2 loading Control

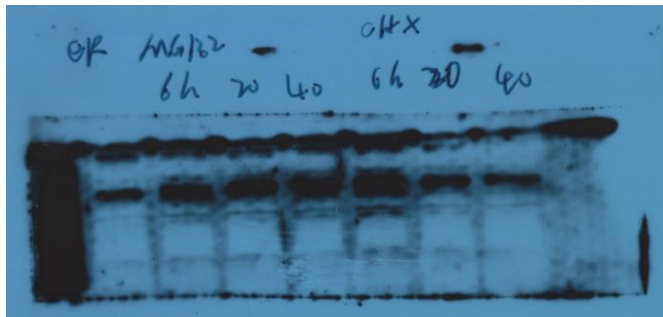

Figure 6c AhNAC2

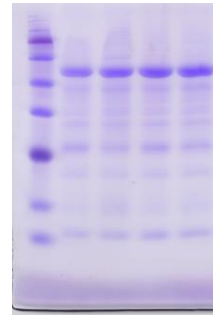

Figure 6c AhNAC2 loading Control

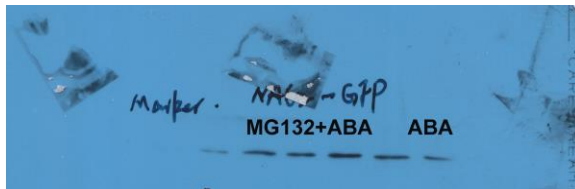

Supplementary Figure S2a

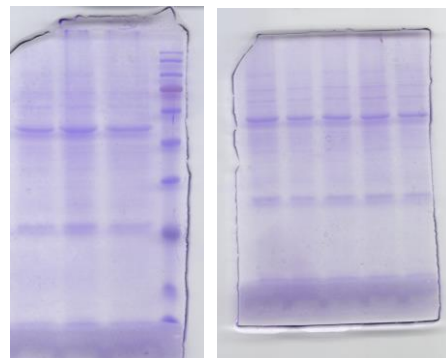

Supplementary Figure S2a loading control

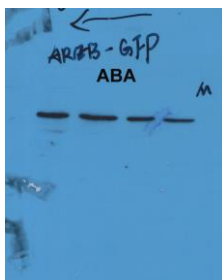

Supplementary Figure S2b

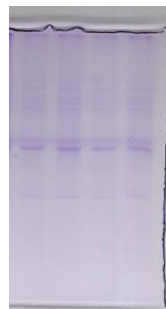

Supplementary Figure S2a loading control
